# Supplementary material for: Vertically aligned ZnO/ZnTe core/shell heterostructures on an AZO substrate for improved photovoltaic performance
Source: Royal Society of Chemistry journal article supplement (doi:10.1039/c6ra27641e), 2017-01-01
Supplement: c6ra27641e1.pdf [file c6ra27641e1.pdf]

**Vertically aligned ZnO/ZnTe core/shell heterostructure on AZO  
substrate for improved photovoltaic performance**

*Songping Luo, <sup>a</sup> Xiaoli He, <sup>a</sup> Heping Shen, <sup>a</sup> Jianbao Li, <sup>a, b</sup> Xuewen Yin, <sup>a</sup> Dan Oron, <sup>c, \*</sup>  
Hong Lin <sup>a, \*</sup>*

<sup>a</sup> State Key Laboratory of New Ceramics & Fine Processing, School of Materials Science and Engineering, Tsinghua University, Beijing 100084, China

<sup>b</sup> Key Laboratory of Ministry of Education for Application Technology of Chemical Materials in Hainan Superior Resources, College of Materials Science and Chemical Engineering, Hainan University, Hainan 570228, China

<sup>c</sup> Department of Physics of Complex Systems, Weizmann Institute of Science, Rehovot 76100, Israel

**\*Corresponding Author:** hong-lin@tsinghua.edu.cn or dan.oron@weizmann.ac.il

## Supporting Information

1. XPS spectra of the ZnO nanorods, ZnTe nanocrystals alone and the ZnO/ZnTe heterostructure.

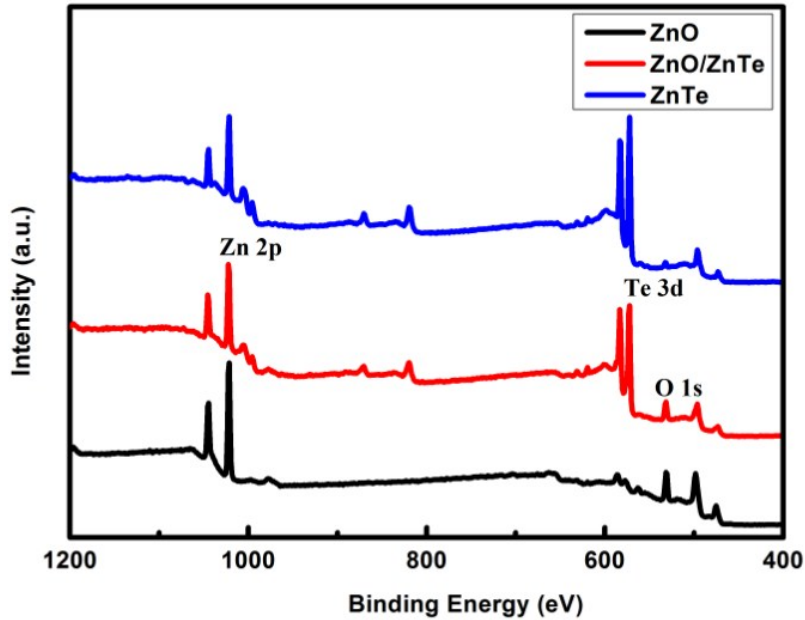

Fig. S1 XPS spectra of the ZnO nanorods, ZnTe nanocrystals alone and the ZnO/ZnTe heterostructure.

2. Measurements for band structure of ZnO

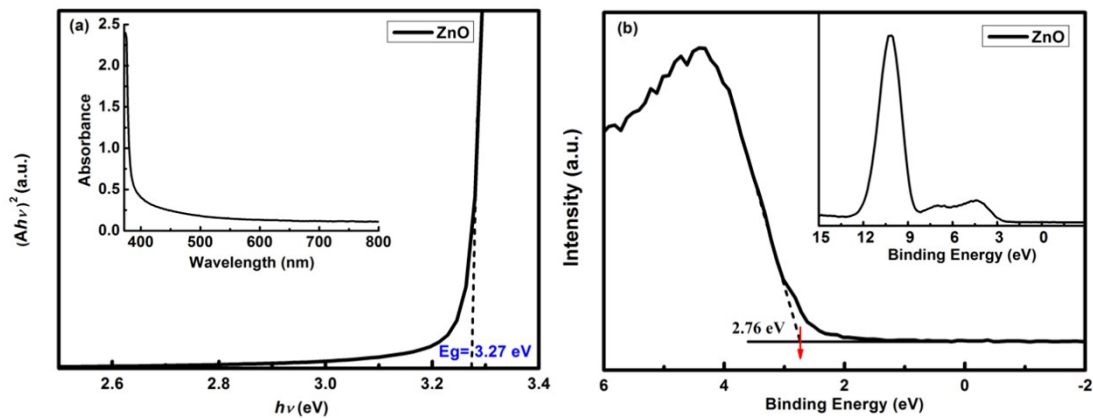

Fig. S2 (a) The dependence of  $(Ah\nu)^2$  against photon energy ( $h\nu$ ) for ZnO nanorods using linear extrapolation for the proposed direct forbidden transition. The absorption spectrum is shown in the inset. (b) XPS valence spectra and the linear interpolations of the leading edge of ZnO nanorods. The inset shows the spectra in wide scan.

### 3. Absorption spectra

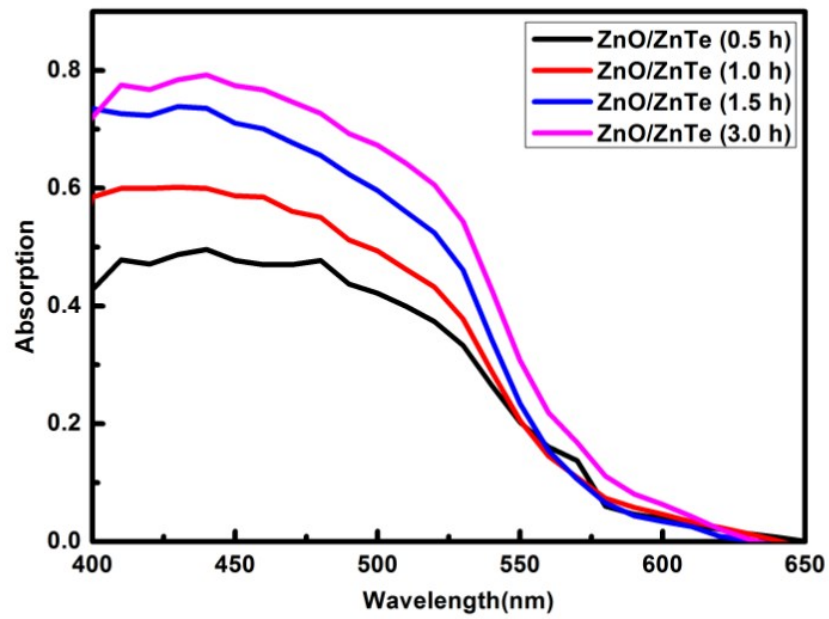

Fig. S3 Absorption spectra of ZnO/ZnTe heterostructures with different growth time.
